# Supplementary material for: Phytochemical and Biological Characteristics of Mexican Chia Seed Oil
Source: PubMed Central journal article supplement (PMC6321551; doi:10.3390/molecules23123219), 2018-12-06
Supplement: molecules-23-03219-s001.pdf [file molecules-23-03219-s001.pdf]

## Supporting information

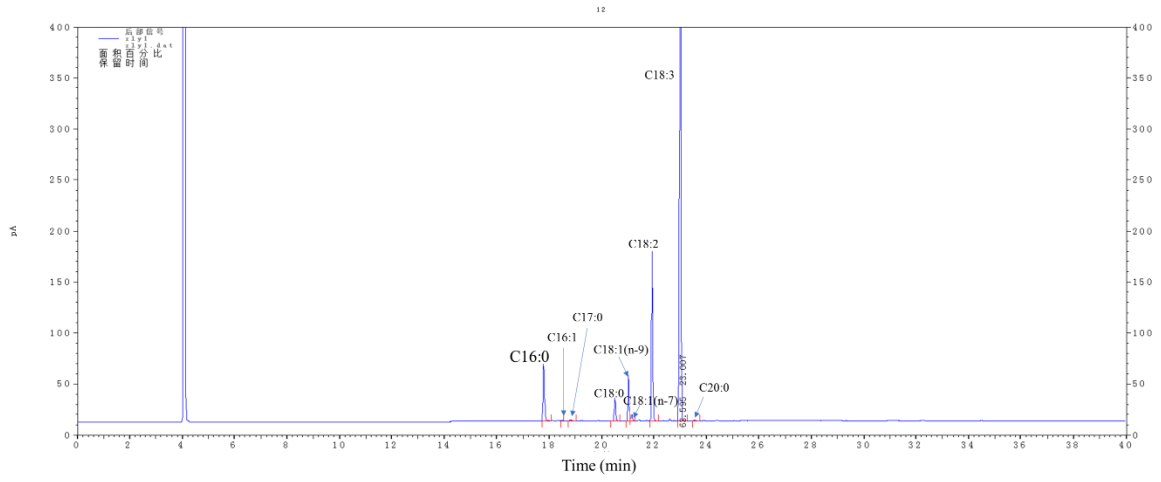

**Figure S1.** HPLC chromatogram of fatty acids or chia seed oils.

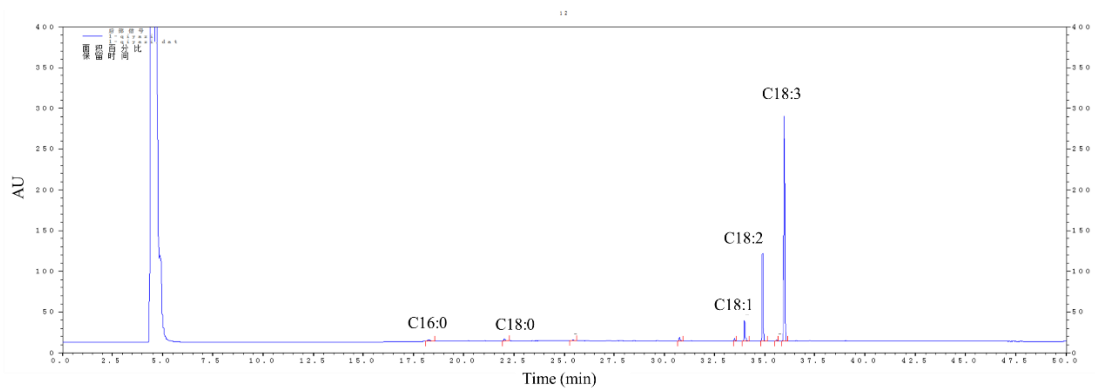

**Figure S2.** HPLC chromatography of sn-2 fatty acids from chia seed oil.

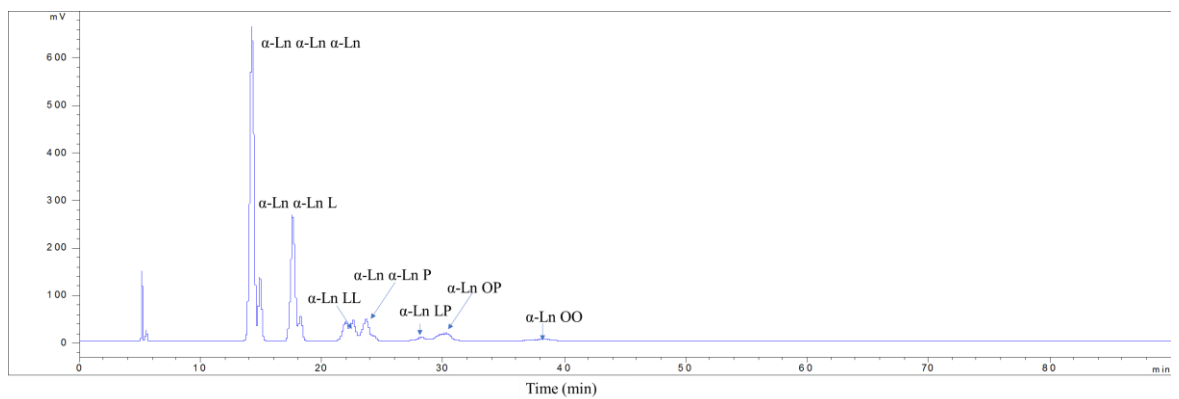

**Figure. S3.** Analysis of triacylglycerols from chia seed oil by HPLC.

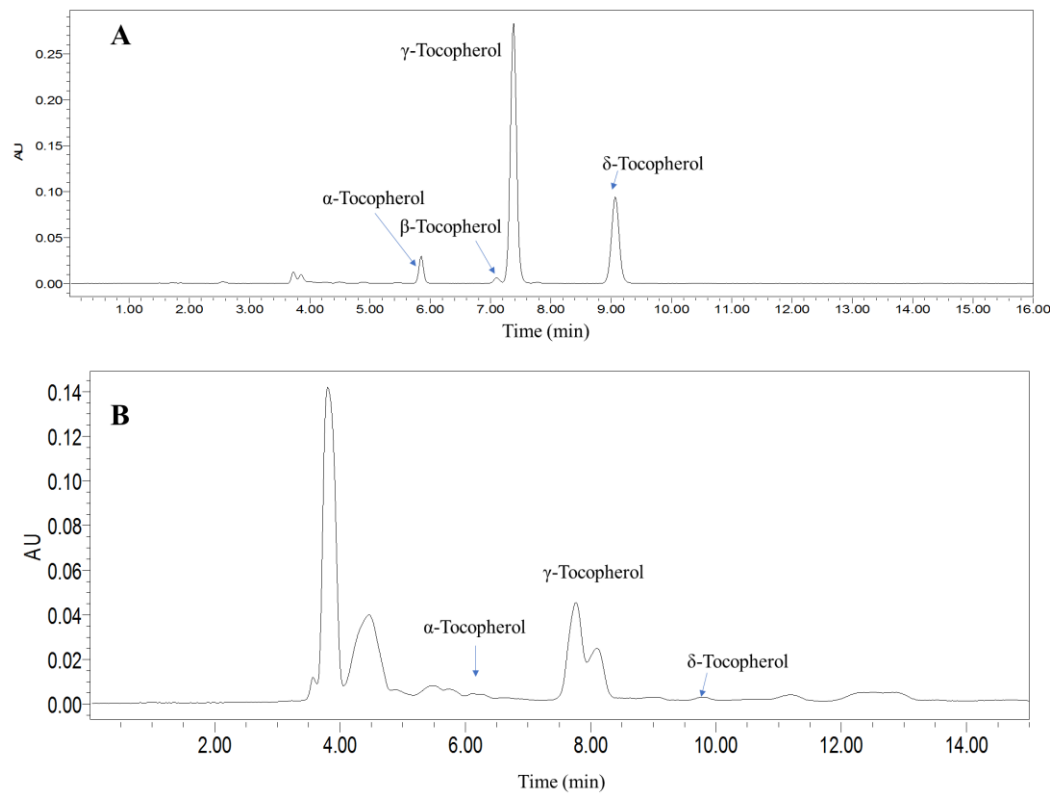

**Figure S4.** HPLC chromatogram of tocopherols in chia seed oil. (A) standards of tocopherols, and (B) tocopherols in chia seed oil.
